# Supplementary material
Source: Springer Nature journal article supplement (https://www.springermedizin.de/resource/supplementary/13051_2012_244_MOESM2_ESM.pdf/9670232)

Percentage Any SBRT Failure

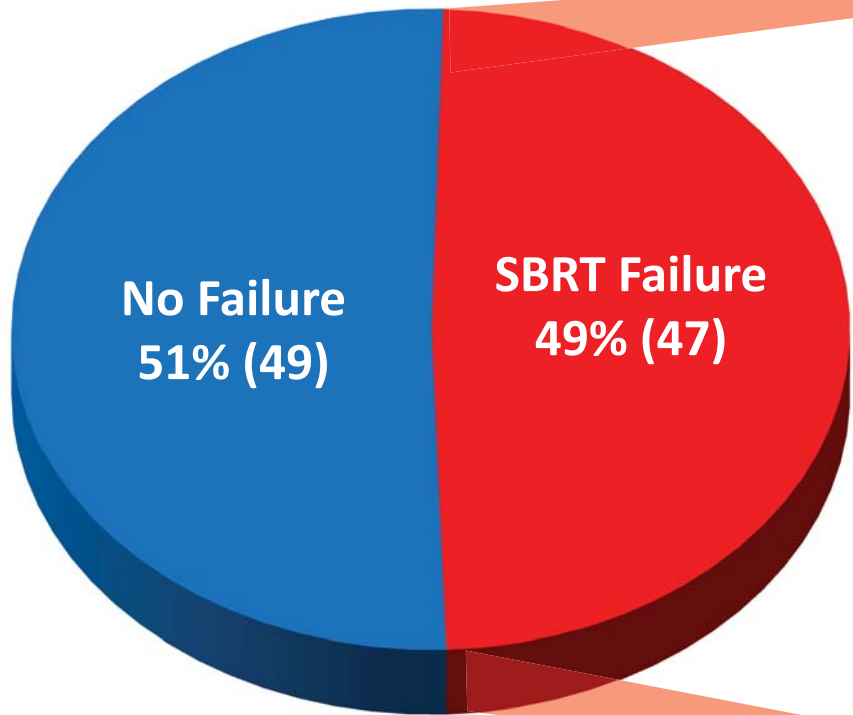

Distribution of Failure Events

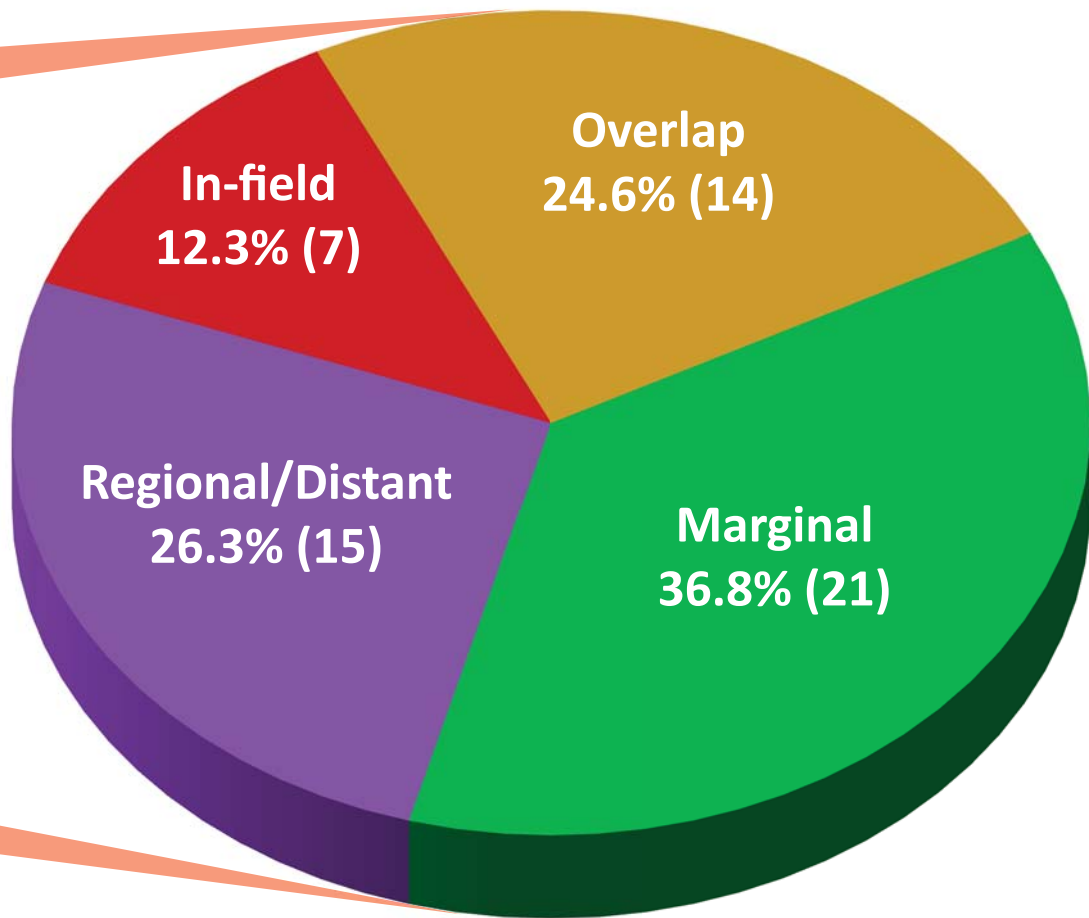

Supplement: MOESM2 [file 9670232]
